# Supplementary material for: Dynamics of the Asian Summer Monsoon Anticyclone: Insights from Potential Vorticity Tendency Diagnostics
Source: Copernicus journal article supplement (doi:10.5194/egusphere-2026-558), 2026-02-04
Supplement: Supplementary file 1 [file egusphere-2026-558-supplement.pdf]

*Supplement of*

**Dynamics of the Asian Summer Monsoon Anticyclone: Insights from Potential Vorticity Tendency Diagnostics**

**Table S1.** Statistics of vortices in each month of boreal summer from 2000-2020

|                              | Time      | Overall | Persistent Vortex |            | Transient Vortex |            |
|------------------------------|-----------|---------|-------------------|------------|------------------|------------|
|                              |           | Count   | Count             | Percentage | Count            | Percentage |
| ERA5<br>(2000-2020)          | Total     | 24940   | 16370             | 65.64%     | 8570             | 34.36%     |
|                              | May       | 4012    | 2179              | 54.31%     | 1833             | 45.29%     |
|                              | June      | 4510    | 2805              | 62.20%     | 1705             | 37.80%     |
|                              | July      | 5272    | 3703              | 70.24%     | 1569             | 29.76%     |
|                              | August    | 5655    | 4096              | 72.43%     | 1559             | 27.57%     |
|                              | September | 5491    | 3587              | 65.33%     | 1904             | 34.67%     |
| JRA-3Q<br>(2000-2020)        | Total     | 24702   | 16099             | 65.17%     | 8603             | 34.83%     |
|                              | May       | 3931    | 2023              | 51.46%     | 1908             | 48.54%     |
|                              | June      | 4466    | 2801              | 62.72%     | 1665             | 37.28%     |
|                              | July      | 5231    | 3716              | 71.04%     | 1515             | 28.96%     |
|                              | August    | 5607    | 3975              | 70.89%     | 1632             | 29.11%     |
|                              | September | 5467    | 3584              | 65.56%     | 1883             | 34.44%     |
| Merra2<br>(2000-2020)<br>ASM | Total     | 25579   | 14448             | 56.48%     | 11131            | 43.52%     |
|                              | May       | 4067    | 2023              | 49.74%     | 2044             | 50.26%     |
|                              | June      | 4774    | 2463              | 51.59%     | 2311             | 48.41%     |
|                              | July      | 5234    | 2998              | 52.28%     | 2236             | 42.72%     |
|                              | August    | 5906    | 3707              | 62.77%     | 2199             | 37.23%     |
|                              | September | 5598    | 3257              | 58.18%     | 2341             | 41.82%     |
| CIESM/BASE<br>(2000-2018)    | Total     | 23551   | 15797             | 67.08%     | 7754             | 32.92%     |
|                              | May       | 3882    | 2362              | 60.84%     | 1520             | 39.16%     |
|                              | June      | 3921    | 2783              | 70.98%     | 1138             | 29.02%     |
|                              | July      | 5390    | 3552              | 65.90%     | 1838             | 34.10%     |
|                              | August    | 5409    | 3649              | 67.46%     | 1762             | 32.54%     |
|                              | September | 4949    | 3451              | 69.73%     | 1798             | 30.27%     |

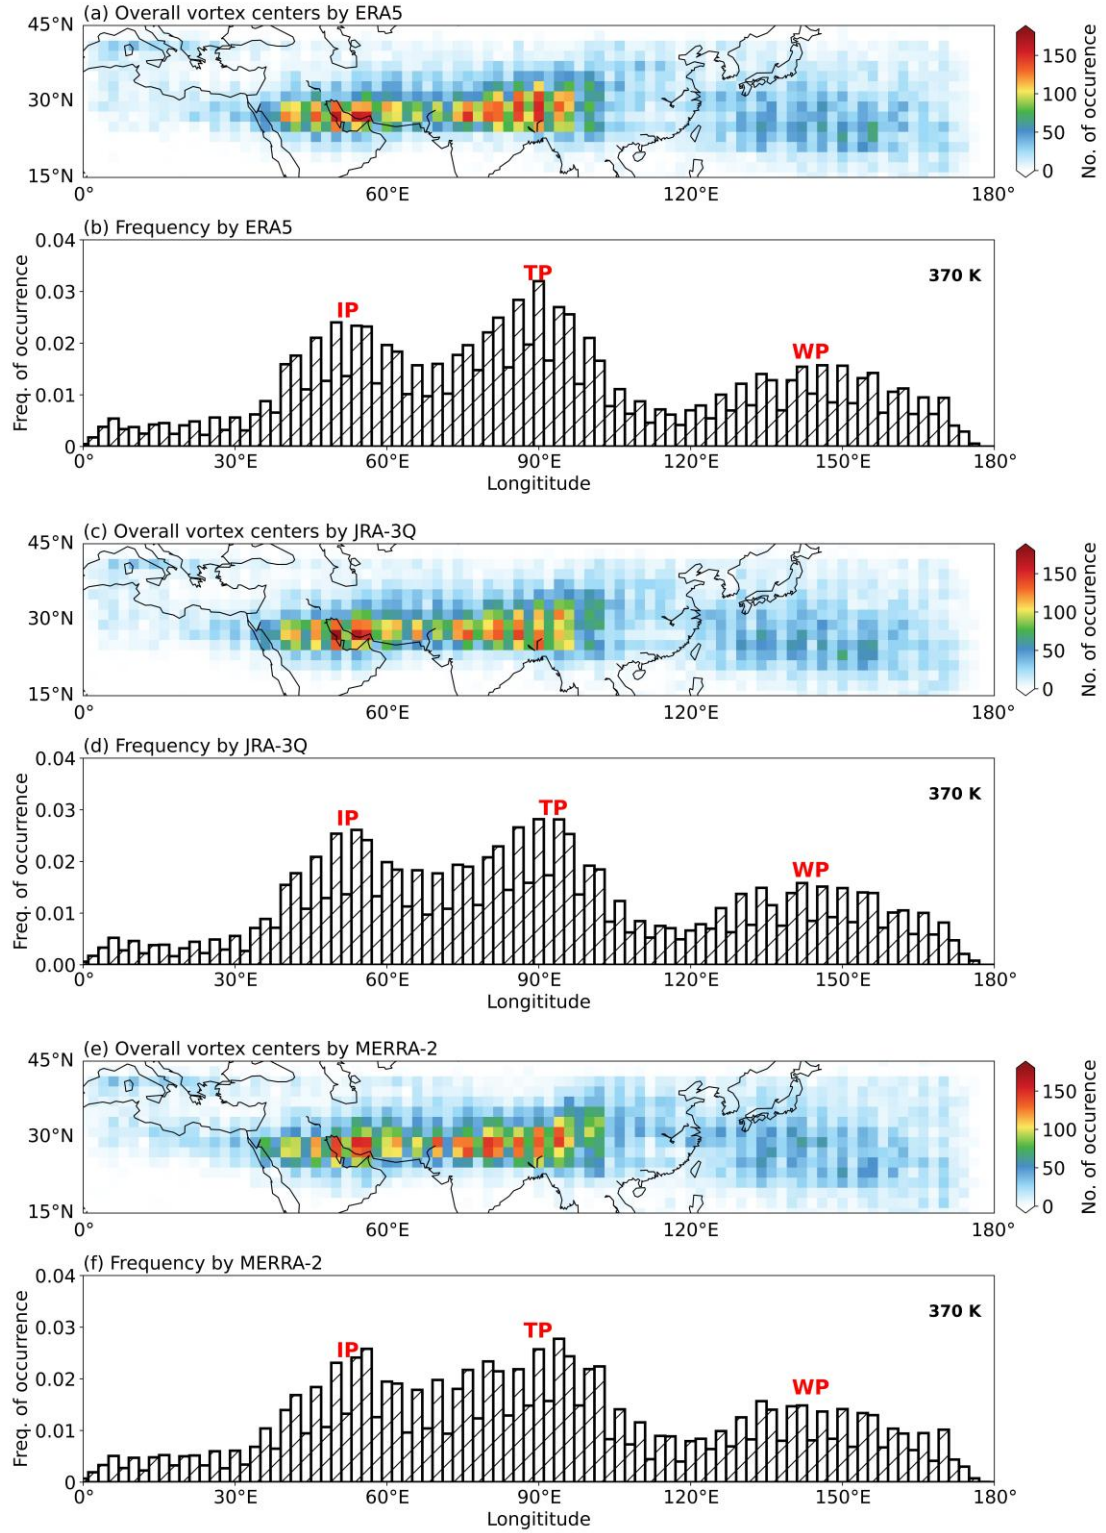

**Figure S1.** The spatial distributions of occurrence frequency of the anticyclone centers at isentropic 370 K using (a, b) ERA5, (c, d) JRA-3Q, (e, f) MERRA-2, during May–September 2000–2020. The “IP” refers to the Iranian Plateau mode, “TP” refers to the Tibetan Plateau mode, and “WP” refers to the Western Pacific mode.

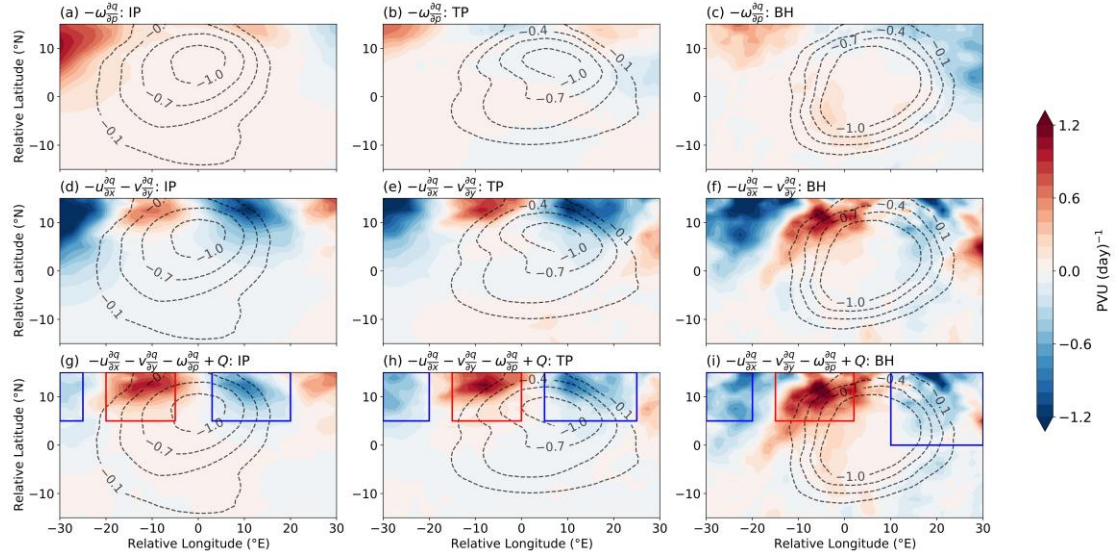

**Figure S2.** The PV tendency from (a)-(c) vertical advection, (d)-(f) horizontal advection, and (g)-(i) sum of each term from three modes on 200 hPa. The black dashed contours show the PV anomaly at 100 hPa which contours from -1 to 0 PVU with interval of 0.3 PVU. The longitudinal and latitudinal extents are the main area of anticyclone, with the red box indicating the main area of divergence, while the blue boxes signify additional zones of divergence.
